# Supplementary material for: Ocean alkalinity enhancement (OAE) does not cause cellular stress in a phytoplankton community of the subtropical Atlantic Ocean
Source: Copernicus journal article supplement (doi:10.5194/bg-22-1865-2025), 2025-04-16
Supplement: Supplementary file 1 [file bg-22-1865-2025-supplement.zip]

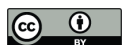

*Supplement of*

**Ocean alkalinity enhancement (OAE) does not cause cellular stress in a phytoplankton community of the subtropical Atlantic Ocean**

**Librada Ramírez et al.**

*Correspondence to:* Librada Ramírez ([librada@uma.es](mailto:librada@uma.es))

- [bg-22-1865-2025-supplement-title-page.pdf](#)
- [Ramirez\\_et al\\_SuppMat\\_2024-847.docx](#)

The copyright of individual parts of the supplement might differ from the article licence.
